# Supplementary material for: Aldose reductase inhibition decelerates optic nerve degeneration by alleviating retinal microglia activation
Source: Springer Nature journal article supplement (doi:10.1038/s41598-023-32702-5), 2023-04-05
Supplement: MOESM1 [file 41598_2023_32702_MOESM1_ESM.pdf]

**A**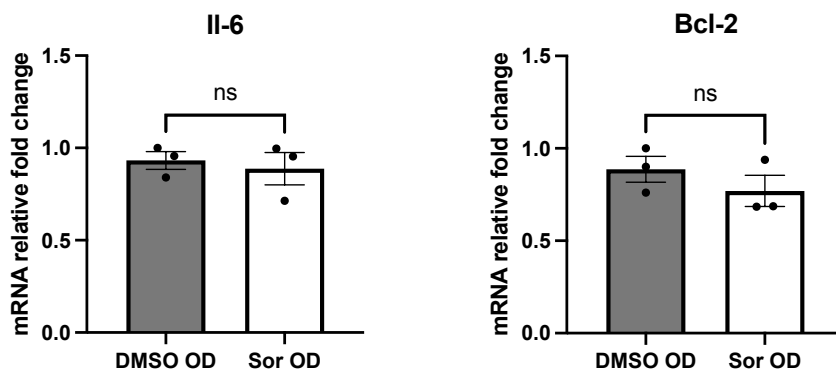

**Figure S1. Sorbinil treatment, in the absence of ONC, does not cause changes to inflammation related genes. (A)** Fold change expression of *il-6* between DMSO and Sorbinil treated retina 1 week after treatment. **(B)** Fold change expression of *bcl-2* between DMSO and Sorbinil treated retina 1 week after treatment.
